# Supplementary material
Source: PubMed Central journal article supplement (PMC11386612)
Supplement: PBI-18-2406-s001.pdf [file PBI-18-2406-s001.pdf]

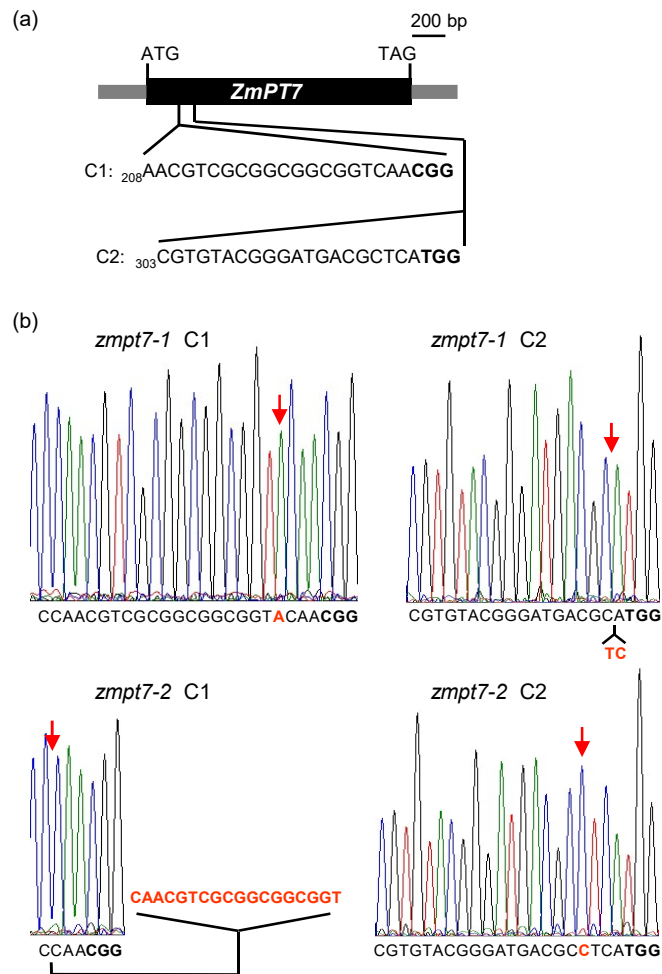

**Figure S1** Identification of *zmpt7* mutants. (a) Diagram of *ZmPT7* showing two target sites (C1 and C2) for CRISPR/Cas9 technology. PAM motifs are indicated with bold letters. The coding region and untranslated regions of *ZmPT7* are indicated by black and gray boxes, respectively. (b) The *zmpt7* mutants generated by CRISPR/Cas9 technology. The mutations of *ZmPT7* in the *zmpt7* mutants were evaluated by sequencing, and indicated by red arrows and letters.

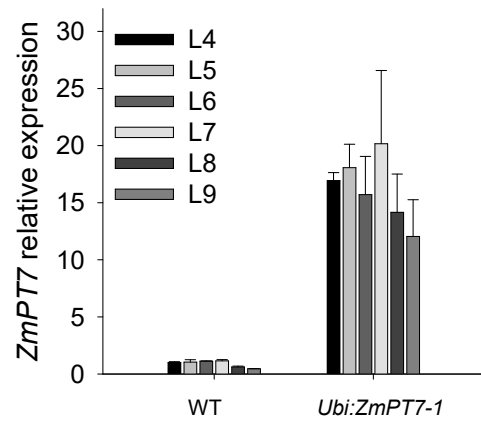

**Figure S2** Analysis of transcript abundance of *ZmPT7* in different leaves of 40-d-old *Ubi:ZmPT7-1* line by qRT-PCR. Data are means  $\pm$  SE of three plants.

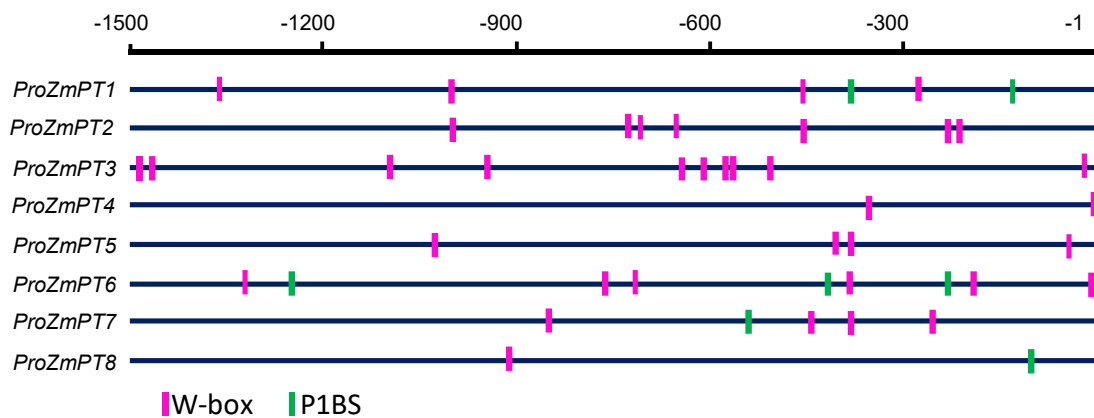

**Figure S3** In silico analysis of *ZmPT* promoter sequences. The 1.5-kb promoter regions of *ZmPT* genes were retrieved from the MaizeGDB database ([www.maizegdb.org](http://www.maizegdb.org)) and predicted the putative binding sites of WRKY or PHR transcription factor. The +1 indicates the transcriptional start site, pink line shows the W-box site, and green line shows the P1BS site.

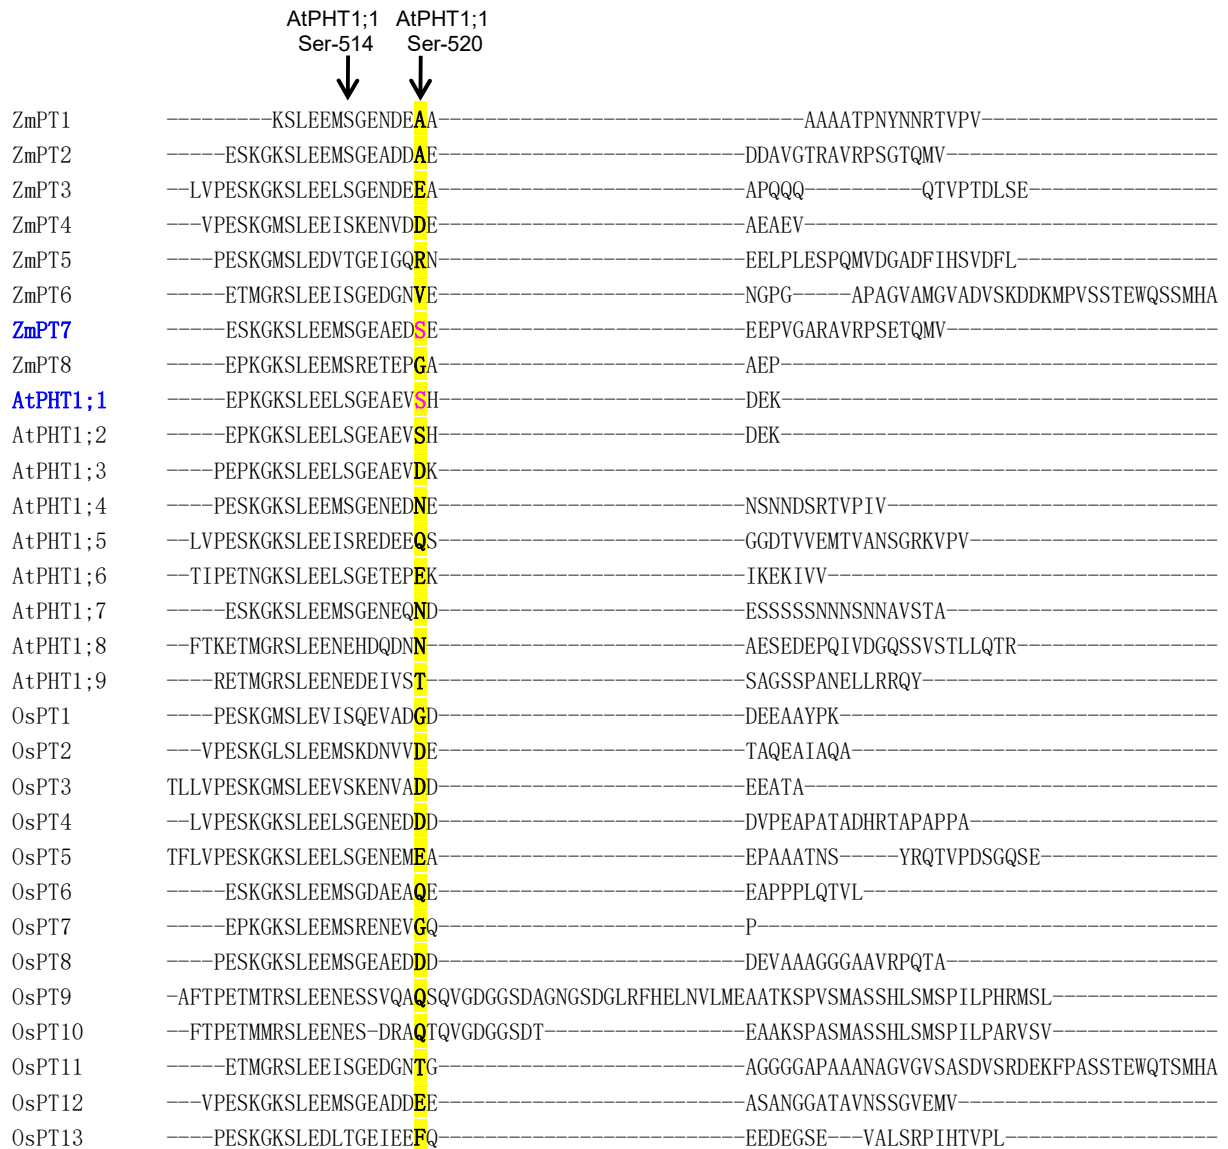

**Figure S4** Sequence alignment of the hydrophilic C-termini (CT) of the PHT1 transporters in maize, *Arabidopsis*, and rice. The CT sequences were retrieved from TMHMM (<http://www.cbs.dtu.dk/services/TMHMM>) and analyzed in Clustalw (<https://www.genome.jp/tools-bin/clustalw>). The ZmPT7 Ser-521 and AtPHT1;1 Ser-520 are indicated with pink bold words, and the conserved residues in PHT1 transporters are bright highlighted.

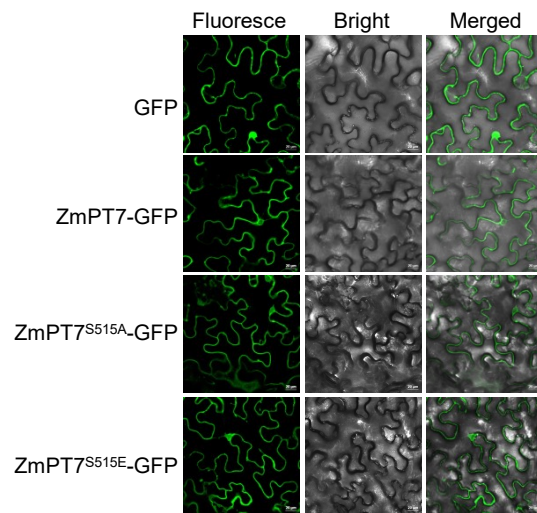

**Figure S5** Location of ZmPT7-GFP and Ser515 variant of ZmPT7 in tobacco leaves. Bars = 20  $\mu$ m.

**Table S1** PHT1 transporters in maize, rice, soybean, and *Arabidopsis*.

| Gene name | Gene ID           | GenBank accession number | Chromosome | Length of CDS sequence (bp) | Length of amino acids sequence (AA) | TM domains | PHT1 signature GGDYPLSATIxSE |
|-----------|-------------------|--------------------------|------------|-----------------------------|-------------------------------------|------------|------------------------------|
| ZmPT1     | GRMZM2G112377_T01 | NM_001112347             | Chr1       | 1632                        | 543                                 | 12         | GGDYPLSATIMSE                |
| ZmPT2     | GRMZM2G154090_T01 | NM_001112346             | Chr1       | 1626                        | 541                                 | 12         | GGDYPLSATIMSE                |
| ZmPT3     | GRMZM2G045473_T01 | MG787470                 | Chr2       | 1608                        | 535                                 | 12         | GGDYPLSATIMSE                |
| ZmPT4     | GRMZM2G070087_T01 | NM_001196972             | Chr1       | 1575                        | 524                                 | 12         | GGDYPLSATIMSE                |
| ZmPT5     | GRMZM2G159075_T01 | MG787471                 | Chr10      | 1794                        | 597                                 | 12         | GGDYPLSATIMSE                |
| ZmPT6     | GRMZM5G881088_T01 | MG787472                 | Chr8       | 1665                        | 554                                 | 12         | GGDYPLSATIMSE                |
| ZmPT7     | GRMZM2G326707_T01 | NM_001111799             | Chr5       | 1620                        | 539                                 | 12         | GGDYPLSATIMSE                |
| ZmPT8     | GRMZM2G075870_T01 | BT086132                 | Chr1       | 1764                        | 587                                 | 12         | GGDYPLSATIMSE                |
| OsPT1     | Os03g05620        | XM_015775809             | Chr3       | 1584                        | 527                                 | 12         | GGDYPLSATIMSE                |
| OsPT2     | Os03g05640        | AF536962                 | Chr3       | 1587                        | 528                                 | 12         | GGDYPLSATIMSE                |
| OsPT3     | Os10g30770        | AF536963                 | Chr10      | 1581                        | 526                                 | 12         | GGDYPLSATIMSE                |
| OsPT4     | Os04g10750        | AF536964                 | Chr4       | 1617                        | 538                                 | 12         | GGDYPLSATIMSE                |
| OsPT5     | Os04g10690        | XM_015780498             | Chr4       | 1647                        | 548                                 | 12         | GGDYPLSATIMSE                |
| OsPT6     | Os08g45000        | AF536966                 | Chr8       | 1605                        | 534                                 | 12         | GGDYPLSATIMSE                |
| OsPT7     | Os03g04360        | AF536967                 | Chr3       | 1581                        | 526                                 | 12         | GGDYPLSATIMSE                |
| OsPT8     | Os10g30790        | AF536968                 | Chr10      | 1626                        | 541                                 | 12         | GGDYPLSATIMSE                |
| OsPT9     | Os06g21920        | AF536969                 | Chr6       | 1749                        | 582                                 | 12         | GGDYPLSATIMSE                |
| OsPT10    | Os06g21950        | AF536970                 | Chr6       | 1659                        | 552                                 | 10         | GGDYPLSATIMSE                |
| OsPT11    | Os01g46860        | AF536971                 | Chr1       | 1668                        | 555                                 | 12         | GGDYPLSATIMSE                |
| OsPT12    | Os03g05610        | AF536972                 | Chr3       | 1626                        | 541                                 | 12         | GGDYPLSATIMSE                |
| OsPT13    | Os04g10800        | XM_015778982             | Chr4       | 1527                        | 508                                 | 10         | GGDYPLSATIMSE                |
| AtPHT1;1  | At5g43350         | NM_123701                | Chr5       | 1575                        | 524                                 | 12         | GGDYPLSATIMSE                |
| AtPHT1;2  | At5g43370         | NM_123703                | Chr5       | 1575                        | 524                                 | 12         | GGDYPLSATIMSE                |
| AtPHT1;3  | At5g43360         | NM_123702                | Chr5       | 1566                        | 521                                 | 12         | GGDYPLSATIMSE                |
| AtPHT1;4  | At2g38940         | NM_129452                | Chr2       | 1605                        | 534                                 | 12         | GGDYPLSATIMSE                |
| AtPHT1;5  | At2g32830         | NM_128843                | Chr2       | 1629                        | 542                                 | 12         | GGDYPLSATIMSE                |
| AtPHT1;6  | At5g43340         | NM_123700                | Chr5       | 1551                        | 516                                 | 12         | GGDYPLSATIMSE                |
| AtPHT1;7  | At3g54700         | NM_001339687             | Chr3       | 1608                        | 535                                 | 12         | GGDYPLSATIMSE                |
| AtPHT1;8  | At1g20860         | NM_101939                | Chr1       | 1605                        | 534                                 | 12         | GGDYPLSATIMSE                |
| AtPHT1;9  | At1g76430         | NM_001332472             | Chr1       | 1599                        | 532                                 | 12         | GGDYPLSATIMSE                |

**Table S1 (continued)** PHT1 transporters in maize, rice, soybean, and *Arabidopsis*.

| Gene name | Gene ID       | GenBank accession number | Chromosome | Length of CDS sequence (bp) | Length of amino acids sequence (AA) | TM domains | PHT1 signature GGDYPLSATIxSE |
|-----------|---------------|--------------------------|------------|-----------------------------|-------------------------------------|------------|------------------------------|
| GmPT1     | Glyma02G00840 | FJ814697                 | Chr2       | 1602                        | 533                                 | 12         | GGDYPLSATIMSE                |
| GmPT2     | Glyma03G31950 | FJ814696                 | Chr3       | 1620                        | 539                                 | 12         | GGDYPLSATIMSE                |
| GmPT3     | Glyma07G34870 | FJ814701                 | Chr7       | 1551                        | 516                                 | 12         | GGDYPLSATIMSE                |
| GmPT4     | Glyma10G00950 | JQ518269                 | Chr10      | 1602                        | 533                                 | 12         | GGDYPLSATIMSE                |
| GmPT5     | Glyma10G04230 | FJ814694                 | Chr10      | 1566                        | 521                                 | 12         | GGDYPLSATIMSE                |
| GmPT6     | Glyma10G33020 | FJ814693                 | Chr10      | 1509                        | 502                                 | 12         | GGDYPLSATIMSE                |
| GmPT7     | Glyma10G33030 | FJ814695                 | Chr10      | 1611                        | 536                                 | 12         | GGDYPLSATIMSE                |
| GmPT8     | Glyma13G08720 | FJ814700                 | Chr13      | 1560                        | 519                                 | 12         | GGDYPLSATIMSE                |
| GmPT9     | Glyma14G28780 | FJ814698                 | Chr14      | 1578                        | 525                                 | 12         | GGDYPLSATIMSE                |
| GmPT10    | Glyma14G36650 | FJ814699                 | Chr14      | 1590                        | 529                                 | 12         | GGDYPLSAVIMSE                |
| GmPT11    | Glyma19G34710 | JQ518270                 | Chr19      | 1620                        | 539                                 | 12         | GGDYPLSATIMSE                |
| GmPT12    | Glyma20G02660 | FJ814692                 | Chr20      | 1521                        | 506                                 | 12         | GGDYPLSSTIMSE                |
| GmPT13    | Glyma20G34610 | FJ789662                 | Chr20      | 1611                        | 536                                 | 12         | GGDYPLSATIMSE                |
| GmPT14    | Glyma20G34620 | JQ518271                 | Chr20      | 1584                        | 527                                 | 12         | GGDYPLSATIMSE                |

**Table S2** Percentage of amino acid identity among maize PHT1 proteins, AtPHT1;1, and OsPT8.

| % ident. | ZmPT1 | ZmPT2 | ZmPT3 | ZmPT4 | ZmPT5 | ZmPT6 | ZmPT7 | AtPHT1;1 | OsPT8 |
|----------|-------|-------|-------|-------|-------|-------|-------|----------|-------|
| ZmPT1    |       |       |       |       |       |       |       | 73.1     | 77.1  |
| ZmPT2    | 77.1  |       |       |       |       |       |       | 72.6     | 86.6  |
| ZmPT3    | 73.8  | 74.2  |       |       |       |       |       | 70.2     | 74.8  |
| ZmPT4    | 72.1  | 72.7  | 71.1  |       |       |       |       | 72.9     | 73.6  |
| ZmPT5    | 48.5  | 48.7  | 50.0  | 48.2  |       |       |       | 47.8     | 49.4  |
| ZmPT6    | 55.7  | 56.9  | 54.3  | 55.3  | 41.4  |       |       | 56.9     | 57.6  |
| ZmPT7    | 76.0  | 93.9  | 73.7  | 73.6  | 49.5  | 56.9  |       | 72.4     | 84.8  |
| ZmPT8    | 69.4  | 65.8  | 64.5  | 63.3  | 47.9  | 48.3  | 65.3  | 64.1     | 66.4  |



**Table S3** Primer sequences used in this study.

| Primer name                                                             | Forward primer (5'→3')                           | Reverse primer (5'→3')                      |
|-------------------------------------------------------------------------|--------------------------------------------------|---------------------------------------------|
| <b>For gene cloning</b>                                                 |                                                  |                                             |
| ZmPT1                                                                   | ATGGCCGCCGGGGACCTT                               | TTACACGGGCACTGTGCG                          |
| ZmPT2                                                                   | ATGGCGCGCGGGGG                                   | CTACACCATCTGGGTCCCC                         |
| ZmPT3                                                                   | ATGGCACACGATCACAAAGGT                            | TTATTCACTCAAATCTGTCGGCAC                    |
| ZmPT4                                                                   | ATGGCGGGAGGCCAGCT                                | CTACACTTCGGCCTCAGCTTCAT                     |
| ZmPT5                                                                   | ATGGGCCTGTGTAGTGCCGT                             | TTATAAAAAATCAACACTGTGGATGAAG                |
| ZmPT6                                                                   | ATGGCGGCGCGGGGCGG                                | TCACGCATGCATGGAGCTC                         |
| ZmPT7                                                                   | ATGGCGCGCGGGGAGA                                 | CTACACCATCTGGGTCTCCGAC                      |
| ZmPT8                                                                   | ATGGACGACTCGGCGCC                                | TTACGGCTCGGCGGCG                            |
| <b>For qRT-PCR assay</b>                                                |                                                  |                                             |
| ZmPT7-qPCR                                                              | GAACCAGGACAGGAGCAAGA                             | CCTCCTCTGAGTCTTCAGCC                        |
| ZmPT2-qPCR                                                              | CATCGGGGCCTTTGGGTTC                              | AGGATAAAGCCAAGCAAGTTGGA                     |
| ZmUBQ                                                                   | CTGGTGCCCTCTCCATATGG                             | CAACACTGACACGACTCATGACA                     |
| <b>For RT-PCR assay</b>                                                 |                                                  |                                             |
| ZmPT7                                                                   | ATGGCGCGCGGGGAGA                                 | CTACACCATCTGGGTCTCCGAC                      |
| EF1 $\alpha$                                                            | ATGCCCCAGGACATCGTGATTTCA                         | TTGGCGGCACCCTTACGTGGATCA                    |
| <b>For yeast complementation assay</b>                                  |                                                  |                                             |
| ZmPT7                                                                   | TTCCTGCAGCCCGGGGATCCATGGCGCGGG<br>GGGAGA         | CTCCACCGCGGTGGCGGCCGCTACACCATCTGGGTCTCCG    |
| AtPHT1;1                                                                | TTCCTGCAGCCCGGGGATCCATGGCCGAACA<br>CAACTAGGAGT   | CTCCACCGCGGTGGCGGCCGCTTATTCTCGTCATGGCTAAC   |
| <b>For <i>pht1;1A4A/ZmPT7</i> and <i>Ubi:ZmPT7</i> transgenic lines</b> |                                                  |                                             |
| ZmPT7                                                                   | tataagcttATGGCGCGCGGGGAGA                        | gactagtCTACACCATCTGGGTCTCCGAC               |
| <b>For ProZmPT7:GUS transgenic line</b>                                 |                                                  |                                             |
| ProZmPT7                                                                | tgcactgcagtgcaacACACGCATGCTAAGGTCA               | ggggtaccccGGCGGATGTTAGCTACCTAG              |
| <b>For protein expression in <i>E. coli</i>.</b>                        |                                                  |                                             |
| ZmPT7-4T-1                                                              | gaattcGAGTCCAAGGGCAAGTCG                         | ataagaatgcgccgctaactatCTACACCATCTGGGTCTCC   |
| <b>For subcellular localization</b>                                     |                                                  |                                             |
| ZmPT7                                                                   | tataagcttATGGCGCGCGGGGAGA                        | gactagtCTACACCATCTGGGTCTCCGAC               |
| <b>For in situ hybridization</b>                                        |                                                  |                                             |
| ZmPT7-Probe                                                             | GATTTAGGTGACACTATAGAATGCTATCGACGCG<br>TGTTCCCTTC | TGTAATACGACTCACTATAGGGCGCGGTAACCGATTATATATG |
